# Supplementary material for: Decoration of trastuzumab with short oligonucleotides: synthesis and detailed characterization
Source: Royal Society of Chemistry journal article supplement (doi:10.1039/c7ob02216f), 2017-01-01
Supplement: c7ob02216f1.pdf [file c7ob02216f1.pdf]

## Full characterization of the conjugation adducts of the anti-Her2 antibody trastuzumab to 22-mer 5'-modified oligonucleotides

### Supplementary Information

A. M. Carvalho,<sup>a,b</sup> A. Manicardi,<sup>a</sup> C. V. Montes,<sup>b</sup> S. B. Gunnoo,<sup>a</sup> R. J. Schneider,<sup>b</sup> and A. Madder\*<sup>a</sup>

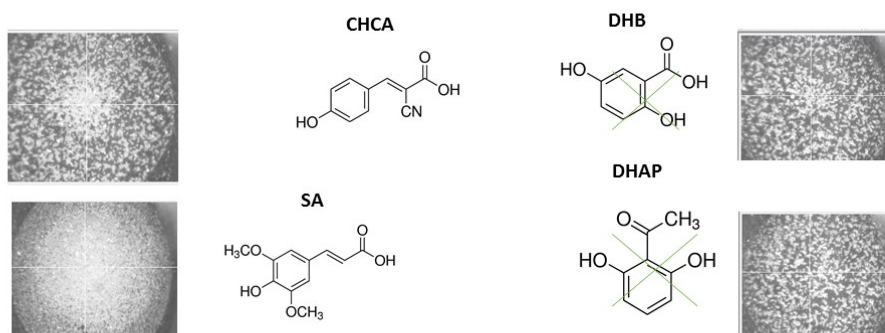

Figure S1. Co-crystallization patterns observed within different MALDI-TOF MS matrices.

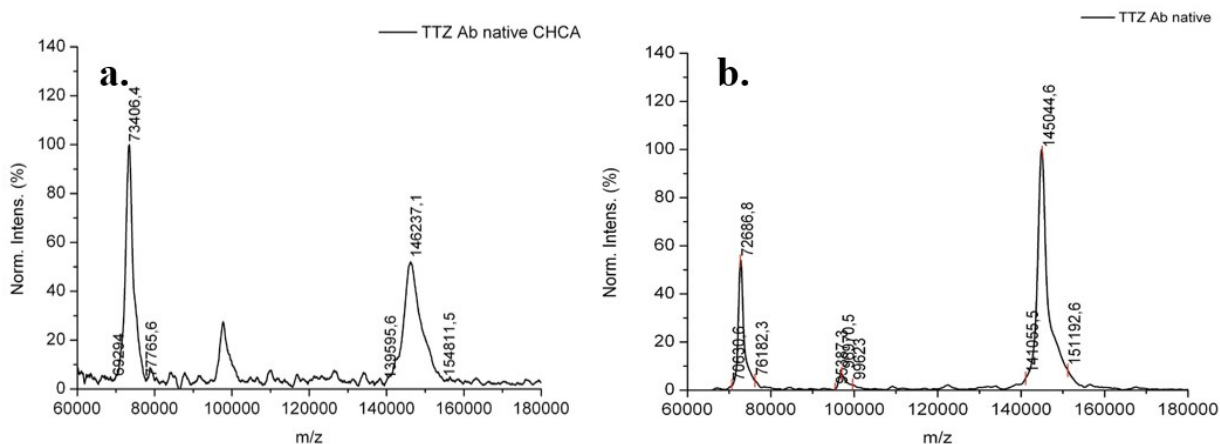

Figure S2. Smoothed MALDI-TOF MS spectra for Native TTZ Ab using a) CHCA matrix or b) SA matrix.

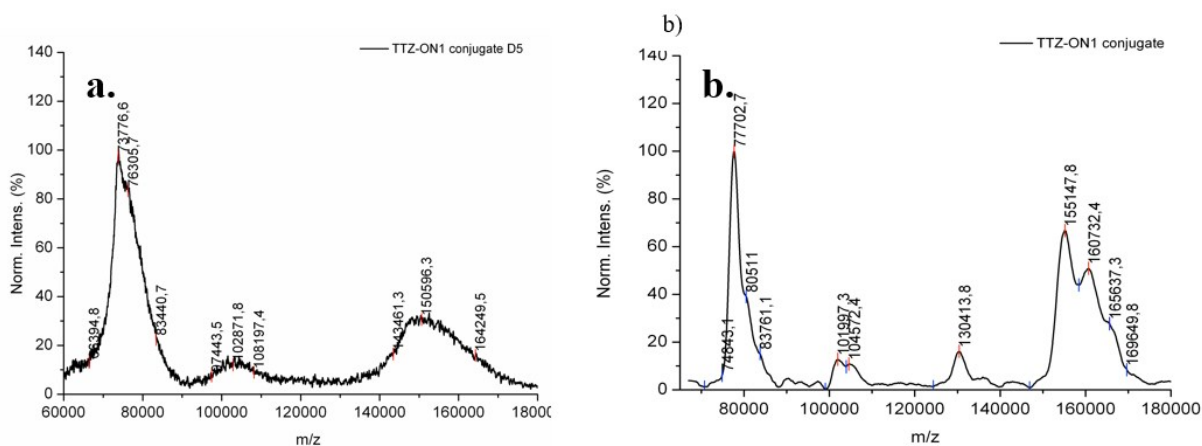

Figure S3. Smoothed MALDI-TOF MS spectra obtained for TTZ-ON1 conjugates using a) CHCA matrix or b) SA matrix.

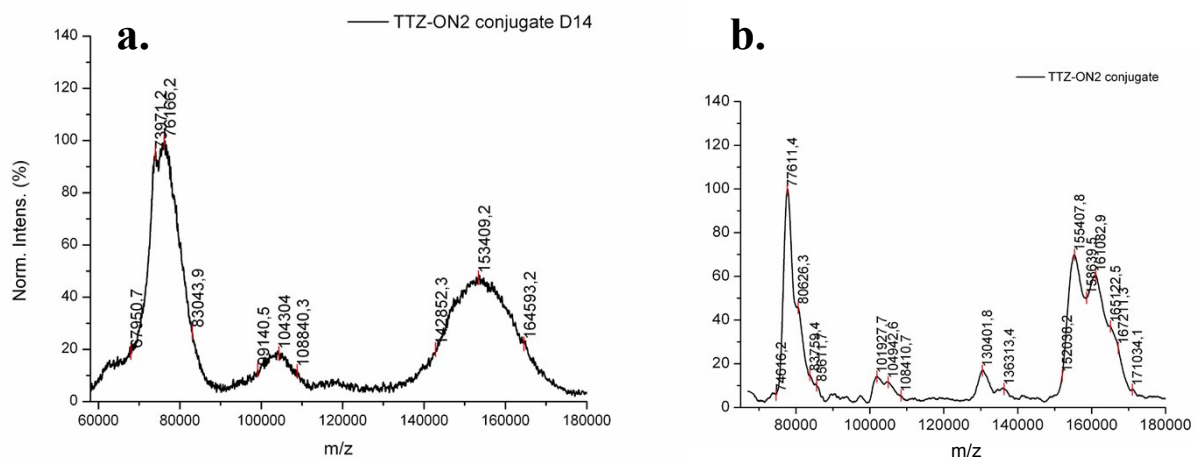

Figure S4. Smoothed MALDI-ToF MS spectra obtained for TTZ-ON2 conjugates using a) CHCA matrix or b) SA matrix.

Table S1. Determination of TTZ : ON ratio based on m/z differences between native TTZ and conjugates.

| Native TTZ           |        | TTZ-ON1 conjugate |                        |              | TTZ-ON2 conjugate    |                        |              |      |
|----------------------|--------|-------------------|------------------------|--------------|----------------------|------------------------|--------------|------|
|                      |        | m/z               | TTZ-ON mass difference | TTZ:ON ratio | m/z                  | TTZ-ON mass difference | TTZ:ON ratio |      |
| [M+2H] <sup>2+</sup> | 72687  | 77703             | 5016                   | 1.46         | [M+2H] <sup>2+</sup> | 77612                  | 4925         | 1.42 |
|                      |        | 80511             | 7824                   | 2.23         |                      | 80626                  | 7939         | 2.30 |
|                      |        | 83761             | 11074                  | 3.42         |                      | 83759                  | 11073        | 3.20 |
| [M+H] <sup>+</sup>   | 145045 | 155148            | 10103                  | 1.46         | [M+H] <sup>+</sup>   | 155408                 | 10363        | 1.50 |
|                      |        | 160732            | 15688                  | 2.27         |                      | 161083                 | 16038        | 2.32 |
|                      |        | 165637            | 20593                  | 2.98         |                      | 167211                 | 22166        | 3.21 |

Table S2. PBS 100 mM buffer composition.

| Salt                                               | mass for 1L solution | Final concentration (mM) |
|----------------------------------------------------|----------------------|--------------------------|
| NaCl                                               | 74 g                 | 1.27 mM                  |
| Na <sub>2</sub> HPO <sub>4</sub>                   | 9.94 g               | 70 mM                    |
| NaH <sub>2</sub> PO <sub>4</sub> ·H <sub>2</sub> O | 4.15 g               | 30 mM                    |
| EDTA                                               | 5.845 g              | 20 M                     |

#### Preparation of SDS denaturing gradient gels (4-10%)

Table S5 summarizes the components used in the preparation of a 4-10% gradient gel. First the 10% resolving gel was prepared by mixing the ingredients in Table S2. TEMED was added last and immediately poured into the glass frames up to the middle. A solution of milliQ water:isopropanol 50:50 was added in order to later allow the second resolving gel (4%) to merge with the first gel (10%). While the 10% gel was polymerizing, the 4% gel was prepared, adding TEMED at last and pouring the mixture on the glass frames up to the top trying to avoid air bubbles. Combs were inserted (1 mm, 10 wells) and the gel was allowed to polymerize for approximately 1h.

Table S3. Ingredients used in the preparation of a denaturing 4-10% discontinuous gel.

| Ingredients             | 10 % (resolving) | 4 % (stacking) |
|-------------------------|------------------|----------------|
| milliQ-H <sub>2</sub> O | 8.7 mL           | 12.0 mL        |
| 10 % (w/v) SDS          | 200 µL           | 200 µL         |
| Tris-acetate 3 M pH 7.0 | 5.0 mL           | 5.0 mL         |
| Acrylamide 29:1         | 6 mL             | 2.66 mL        |
| APS 10 %                | 100 µL           | 100 µL         |
| TEMED                   | 15 µL            | 20 µL          |
| Final Volume            | 20 mL            | 20 mL          |

Table S4. Ionization parameters for MALDI-ToF MS characterization of TTZ-ON conjugates.

|                                    |            |
|------------------------------------|------------|
| Detector gain                      | 51x1999 V  |
| Smart beam parameter Set Frequency | 66.7 Hz    |
| Sample Rate and Digitizer Settings | 0.05 GS/s  |
| Ion Suppression up to              | < 60000 Da |
| Pulsed Ion Extraction              | 2000 ns    |
